# Supplementary material for: The Effects of Selenium on Wheat Fusarium Head Blight and DON Accumulation Were Selenium Compound-Dependent
Source: PubMed Central journal article supplement (PMC7551897; doi:10.3390/toxins12090573), 2020-09-06
Supplement: toxins-12-00573-s001.pdf [file toxins-12-00573-s001.pdf]

## Supplementary Materials: The Effects of Selenium on Wheat Fusarium Head Blight and DON Accumulation were Selenium Compound-Dependent

Xueyun Mao, Chen Hua, Liang Yang, Yuhui Zhang, Zhengxi Sun, Lei Li and Tao Li \*

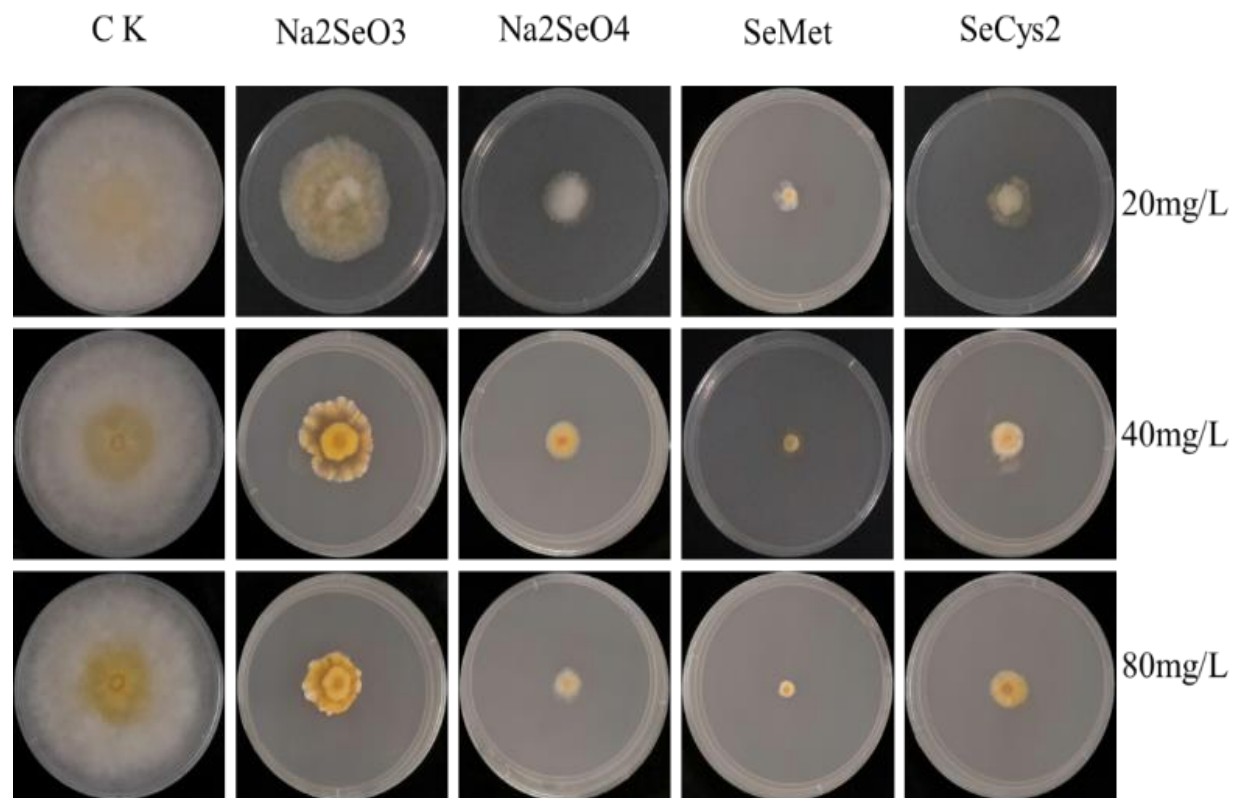

Figure S1. The mycelial colony cultured for 96 hours treated by different Se species.

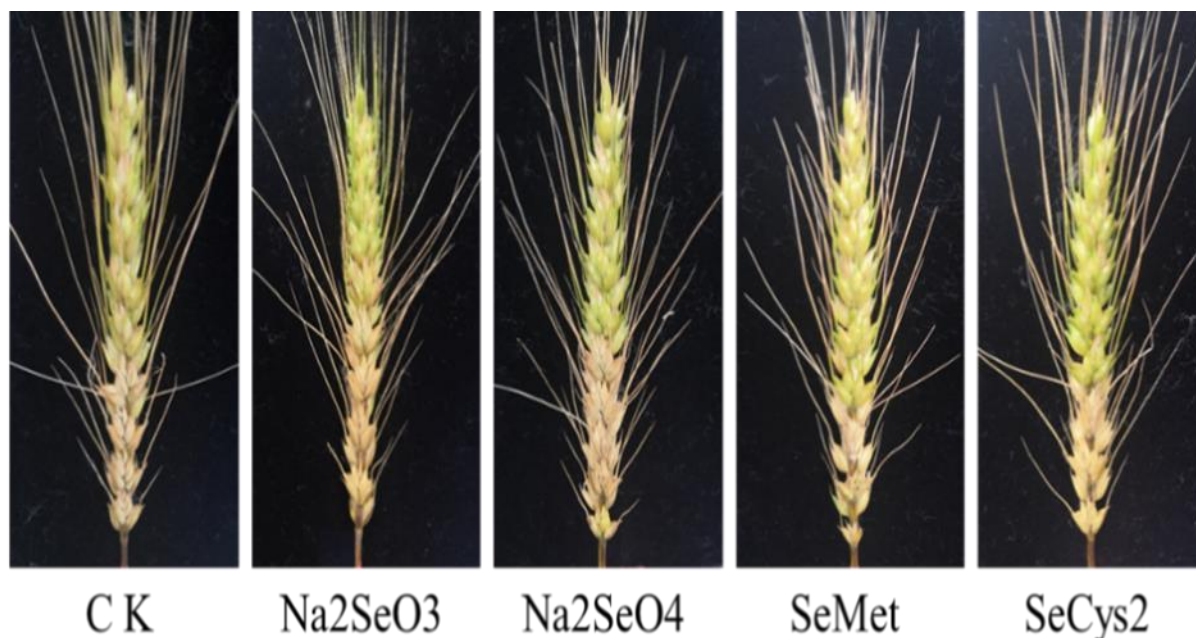

**Figure S2.** FHB severities at 25 days after inoculation under treatments with different Se species.

**Table S1.** The correlation analysis among PSS, DON content and Se content.

| Trait       |                          | PSS   | DON content | Se content |
|-------------|--------------------------|-------|-------------|------------|
| PSS         | Pearson correlation      | 1     |             |            |
|             | Significance (bilateral) |       |             |            |
| DON content | Pearson correlation      | 0.757 | 1           |            |
|             | Significance (bilateral) | 0.139 |             |            |
| Se content  | Pearson correlation      | 0.273 | 0.079       | 1          |
|             | Significance (bilateral) | 0.657 | 0.899       |            |

### Technical Note: The Conditions of Chromatography and Mass Spectrometry Parameters

LC operating conditions:

1. Chromatographic column: Waters ACQUITY UPLC HSS T3, 2.1 × 100mm Column, 1.8 μm.
2. Mobile phase: aqueous phase (A), water + 0.1% formic acid; organic phase (B), methanol.
3. Gradient elution: 10% B (0.0 min–0.5 min), 35% B (0.5 min–1.0 min), 50% B (1.0 min–1.5 min), 65% B (1.5 min–3.0 min), 90% B (3.0 min–5.0 min), 10% B (5.0 min–8.0 min).
4. Flow rate of mobile phase: 0.3 mL/min.
5. Column temperature: 40 °C.
6. Sample size: 10 μL.

Mass spectrometry parameters:

| Name | Parent (m/z) | Product (m/z) | SRM Collision Energy (eV) | Retention Time (min) | Time Window (min) | Polarity |
|------|--------------|---------------|---------------------------|----------------------|-------------------|----------|
| DON  | 297.1        | 91.1          | 40                        | 5.00                 | 8.00              | +        |
| DON  | 297.1        | 175.2         | 15                        | 5.00                 | 8.00              | +        |

Limit of determination is 1 μg/kg.; +, positive ion mode
